# Supplementary material
Source: PubMed Central journal article supplement (PMC6187205)
Supplement: IMM-155-367-s006.pdf [file IMM-155-367-s006.pdf]

**Supplementary Table 1: Linear B cell c-TXNPx epitopes predicted by  
Bepipred 2.0.**

| <b>Rank</b> | <b>Sequence</b> | <b>Location</b> | <b>Mean<br/>residue<br/>score <sup>a)</sup></b> |
|-------------|-----------------|-----------------|-------------------------------------------------|
| 1           | SIERKRGGLGQ     | 89-99           | 0.594                                           |
| 2           | DAKLNHPAPDF     | 5-15            | 0.558                                           |
| 3           | NDLPVGRDV       | 145-153         | 0.558                                           |
| 4           | VLKEEDG         | 118-124         | 0.557                                           |
| 5           | KPGDKTMKPDPEK   | 178-190         | 0.550                                           |
| 6           | NGTF            | 23-26           | 0.542                                           |
| 7           | SHLA            | 83-86           | 0.538                                           |

a) Mean residue score is the average of each amino acid score in the predicted peptide.

**Supplementary Table 2: Conformational B-cell epitope prediction performed by DiscoTope 2.0.**

| <b>Epitope Residue</b> | <b>Monomer</b> | <b>Aminoacid position</b> | <b>DiscoTope score</b> |
|------------------------|----------------|---------------------------|------------------------|
| <b>K</b>               | A              | 93                        | -2.350                 |
| <b>K</b>               | A              | 168                       | -2.815                 |
| <b>H</b>               | A              | 169                       | -2.616                 |
| <b>G</b>               | A              | 170                       | -0.270                 |
| <b>G</b>               | A              | 180                       | -2.669                 |
| <b>K</b>               | A              | 182                       | -2.405                 |
| <b>K</b>               | A              | 185                       | -2.447                 |
| <b>D</b>               | A              | 187                       | -2.998                 |
| <b>E</b>               | A              | 189                       | -2.958                 |
| <b>K</b>               | A              | 190                       | -1.910                 |
| <b>K</b>               | A              | 192                       | -2.458                 |
| <b>E</b>               | A              | 193                       | -1.894                 |
| <b>G</b>               | A              | 196                       | -1.934                 |
| <b>A</b>               | A              | 197                       | -2.061                 |
| <b>K</b>               | B              | 93                        | -2.381                 |
| <b>R</b>               | B              | 94                        | -3.617                 |
| <b>K</b>               | B              | 168                       | -3.141                 |
| <b>H</b>               | B              | 169                       | -2.565                 |
| <b>G</b>               | B              | 170                       | -0.202                 |
| <b>G</b>               | B              | 180                       | -2.298                 |
| <b>K</b>               | B              | 182                       | -2.352                 |
| <b>K</b>               | B              | 185                       | -2.300                 |

|          |          |            |               |
|----------|----------|------------|---------------|
| <b>D</b> | <b>B</b> | <b>187</b> | <b>-2.757</b> |
| <b>E</b> | <b>B</b> | <b>189</b> | <b>-2.651</b> |
| <b>K</b> | <b>B</b> | <b>190</b> | <b>-1.921</b> |
| <b>K</b> | <b>B</b> | <b>192</b> | <b>-2.217</b> |
| <b>E</b> | <b>B</b> | <b>193</b> | <b>-2.137</b> |
| <b>G</b> | <b>B</b> | <b>196</b> | <b>-1.815</b> |
| <b>A</b> | <b>B</b> | <b>197</b> | <b>0.001</b>  |
| <b>K</b> | <b>C</b> | <b>93</b>  | <b>-2.369</b> |
| <b>K</b> | <b>C</b> | <b>168</b> | <b>-2.686</b> |
| <b>H</b> | <b>C</b> | <b>169</b> | <b>-2.574</b> |
| <b>G</b> | <b>C</b> | <b>170</b> | <b>-0.226</b> |
| <b>G</b> | <b>C</b> | <b>180</b> | <b>-2.589</b> |
| <b>K</b> | <b>C</b> | <b>182</b> | <b>-2.339</b> |
| <b>K</b> | <b>C</b> | <b>185</b> | <b>-2.444</b> |
| <b>D</b> | <b>C</b> | <b>187</b> | <b>-2.550</b> |
| <b>E</b> | <b>C</b> | <b>189</b> | <b>-2.840</b> |
| <b>K</b> | <b>C</b> | <b>190</b> | <b>-1.901</b> |
| <b>K</b> | <b>C</b> | <b>192</b> | <b>-2.442</b> |
| <b>E</b> | <b>C</b> | <b>193</b> | <b>-2.015</b> |
| <b>G</b> | <b>C</b> | <b>196</b> | <b>-2.010</b> |
| <b>A</b> | <b>C</b> | <b>197</b> | <b>-0.151</b> |
| <b>K</b> | <b>D</b> | <b>93</b>  | <b>-2.358</b> |
| <b>R</b> | <b>D</b> | <b>94</b>  | <b>-3.561</b> |
| <b>K</b> | <b>D</b> | <b>168</b> | <b>-2.710</b> |
| <b>H</b> | <b>D</b> | <b>169</b> | <b>-2.641</b> |
| <b>G</b> | <b>D</b> | <b>170</b> | <b>-0.293</b> |
| <b>G</b> | <b>D</b> | <b>180</b> | <b>-2.665</b> |

|          |          |            |               |
|----------|----------|------------|---------------|
| <b>K</b> | <b>D</b> | <b>182</b> | <b>-2.302</b> |
| <b>K</b> | <b>D</b> | <b>185</b> | <b>-2.154</b> |
| <b>D</b> | <b>D</b> | <b>187</b> | <b>-3.026</b> |
| <b>E</b> | <b>D</b> | <b>189</b> | <b>-2.787</b> |
| <b>K</b> | <b>D</b> | <b>190</b> | <b>-2.127</b> |
| <b>K</b> | <b>D</b> | <b>192</b> | <b>-2.458</b> |
| <b>E</b> | <b>D</b> | <b>193</b> | <b>-2.243</b> |
| <b>G</b> | <b>D</b> | <b>196</b> | <b>-1.893</b> |
| <b>A</b> | <b>D</b> | <b>197</b> | <b>-2.063</b> |
| <b>K</b> | <b>E</b> | <b>93</b>  | <b>-2.416</b> |
| <b>R</b> | <b>E</b> | <b>94</b>  | <b>-3.634</b> |
| <b>K</b> | <b>E</b> | <b>168</b> | <b>-2.708</b> |
| <b>H</b> | <b>E</b> | <b>169</b> | <b>-2.551</b> |
| <b>G</b> | <b>E</b> | <b>170</b> | <b>-0.337</b> |
| <b>G</b> | <b>E</b> | <b>180</b> | <b>-2.679</b> |
| <b>K</b> | <b>E</b> | <b>182</b> | <b>-2.424</b> |
| <b>K</b> | <b>E</b> | <b>185</b> | <b>-2.405</b> |
| <b>E</b> | <b>E</b> | <b>189</b> | <b>-2.933</b> |
| <b>K</b> | <b>E</b> | <b>190</b> | <b>-2.001</b> |
| <b>K</b> | <b>E</b> | <b>192</b> | <b>-2.355</b> |
| <b>E</b> | <b>E</b> | <b>193</b> | <b>-2.302</b> |
| <b>G</b> | <b>E</b> | <b>196</b> | <b>-1.989</b> |
| <b>A</b> | <b>E</b> | <b>197</b> | <b>-1.998</b> |
| <b>K</b> | <b>F</b> | <b>93</b>  | <b>-2.355</b> |
| <b>R</b> | <b>F</b> | <b>94</b>  | <b>-3.574</b> |
| <b>K</b> | <b>F</b> | <b>168</b> | <b>-2.811</b> |
| <b>H</b> | <b>F</b> | <b>169</b> | <b>-2.587</b> |

|          |          |     |        |
|----------|----------|-----|--------|
| <b>G</b> | <b>F</b> | 170 | -0.258 |
| <b>G</b> | <b>F</b> | 180 | -2.630 |
| <b>K</b> | <b>F</b> | 182 | -2.375 |
| <b>K</b> | <b>F</b> | 185 | -2.447 |
| <b>D</b> | <b>F</b> | 187 | -3.004 |
| <b>E</b> | <b>F</b> | 189 | -2.940 |
| <b>K</b> | <b>F</b> | 190 | -1.887 |
| <b>K</b> | <b>F</b> | 192 | -2.312 |
| <b>E</b> | <b>F</b> | 193 | -2.221 |
| <b>G</b> | <b>F</b> | 196 | -1.808 |
| <b>A</b> | <b>F</b> | 197 | -2.333 |
| <b>K</b> | <b>G</b> | 93  | -4.804 |
| <b>K</b> | <b>G</b> | 168 | -2.801 |
| <b>H</b> | <b>G</b> | 169 | -2.338 |
| <b>G</b> | <b>G</b> | 170 | -0.230 |
| <b>G</b> | <b>G</b> | 180 | -2.402 |
| <b>K</b> | <b>G</b> | 182 | -2.238 |
| <b>K</b> | <b>G</b> | 185 | -2.308 |
| <b>D</b> | <b>G</b> | 187 | -3.588 |
| <b>E</b> | <b>G</b> | 189 | -2.678 |
| <b>K</b> | <b>G</b> | 190 | -2.170 |
| <b>K</b> | <b>G</b> | 192 | -2.300 |
| <b>E</b> | <b>G</b> | 193 | -2.229 |
| <b>G</b> | <b>G</b> | 196 | -1.915 |
| <b>A</b> | <b>G</b> | 197 | -0.041 |
| <b>K</b> | <b>H</b> | 93  | -2.369 |
| <b>K</b> | <b>H</b> | 168 | -2.827 |

|          |          |     |        |
|----------|----------|-----|--------|
| <b>H</b> | <b>H</b> | 169 | -2.410 |
| <b>G</b> | <b>H</b> | 170 | -0.321 |
| <b>G</b> | <b>H</b> | 180 | -2.506 |
| <b>K</b> | <b>H</b> | 182 | -2.446 |
| <b>K</b> | <b>H</b> | 185 | -2.377 |
| <b>E</b> | <b>H</b> | 189 | -2.664 |
| <b>K</b> | <b>H</b> | 190 | -2.258 |
| <b>K</b> | <b>H</b> | 192 | -2.320 |
| <b>E</b> | <b>H</b> | 193 | -2.246 |
| <b>G</b> | <b>H</b> | 196 | -2.442 |
| <b>A</b> | <b>H</b> | 197 | -1.963 |
| <b>K</b> | <b>I</b> | 93  | -2.371 |
| <b>R</b> | <b>I</b> | 94  | -3.571 |
| <b>K</b> | <b>I</b> | 168 | -2.700 |
| <b>H</b> | <b>I</b> | 169 | -2.632 |
| <b>G</b> | <b>I</b> | 170 | -0.010 |
| <b>G</b> | <b>I</b> | 180 | -2.543 |
| <b>K</b> | <b>I</b> | 182 | -2.529 |
| <b>K</b> | <b>I</b> | 185 | -2.048 |
| <b>D</b> | <b>I</b> | 187 | -3.431 |
| <b>E</b> | <b>I</b> | 189 | -2.757 |
| <b>K</b> | <b>I</b> | 190 | -2.116 |
| <b>K</b> | <b>I</b> | 192 | -2.435 |
| <b>E</b> | <b>I</b> | 193 | -2.006 |
| <b>G</b> | <b>I</b> | 196 | -1.756 |
| <b>A</b> | <b>I</b> | 197 | -2.060 |
| <b>K</b> | <b>J</b> | 93  | -2.394 |

|          |          |            |               |
|----------|----------|------------|---------------|
| <b>R</b> | <b>J</b> | <b>94</b>  | <b>-3.619</b> |
| <b>K</b> | <b>J</b> | <b>168</b> | <b>-2.813</b> |
| <b>H</b> | <b>J</b> | <b>169</b> | <b>-2.560</b> |
| <b>G</b> | <b>J</b> | <b>170</b> | <b>-0.204</b> |
| <b>G</b> | <b>J</b> | <b>180</b> | <b>-2.583</b> |
| <b>K</b> | <b>J</b> | <b>182</b> | <b>-2.330</b> |
| <b>K</b> | <b>J</b> | <b>185</b> | <b>-2.078</b> |
| <b>D</b> | <b>J</b> | <b>187</b> | <b>-2.740</b> |
| <b>E</b> | <b>J</b> | <b>189</b> | <b>-2.947</b> |
| <b>K</b> | <b>J</b> | <b>190</b> | <b>-1.888</b> |
| <b>K</b> | <b>J</b> | <b>192</b> | <b>-2.421</b> |
| <b>E</b> | <b>J</b> | <b>193</b> | <b>-2.228</b> |
| <b>G</b> | <b>J</b> | <b>196</b> | <b>-1.802</b> |
| <b>A</b> | <b>J</b> | <b>197</b> | <b>-0.016</b> |
