# Supplementary material
Source: PubMed Central journal article supplement (PMC6187205)

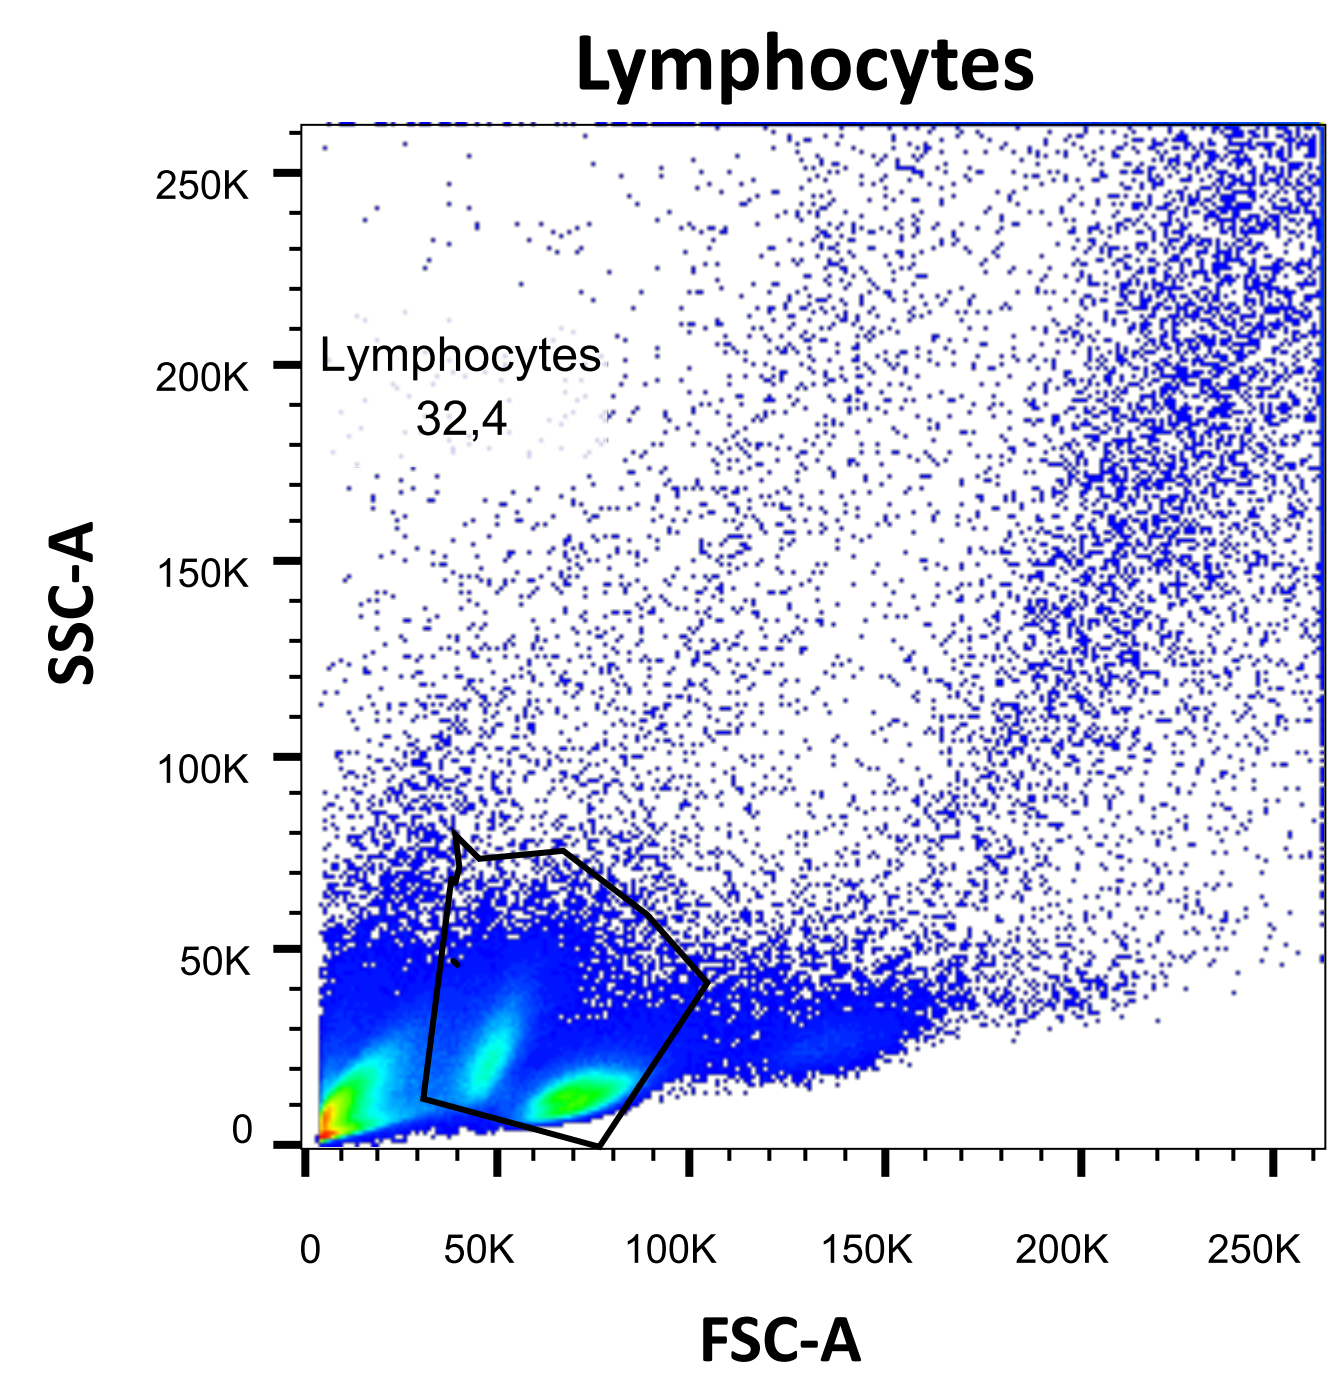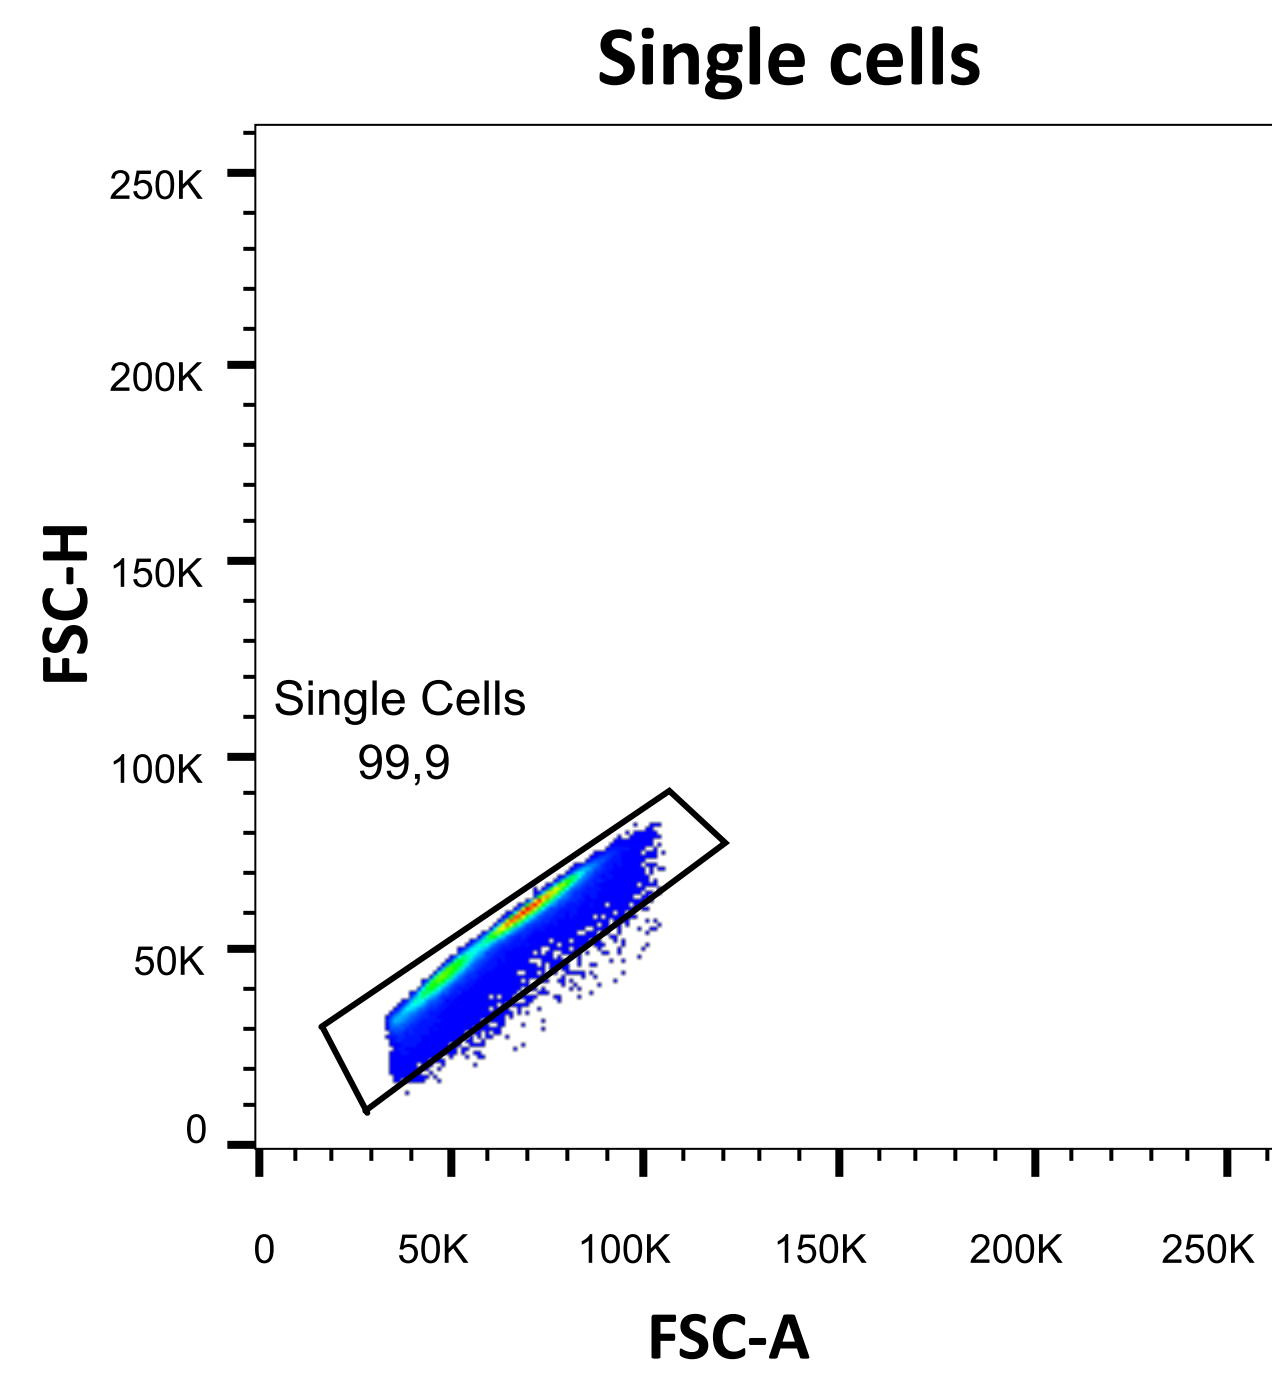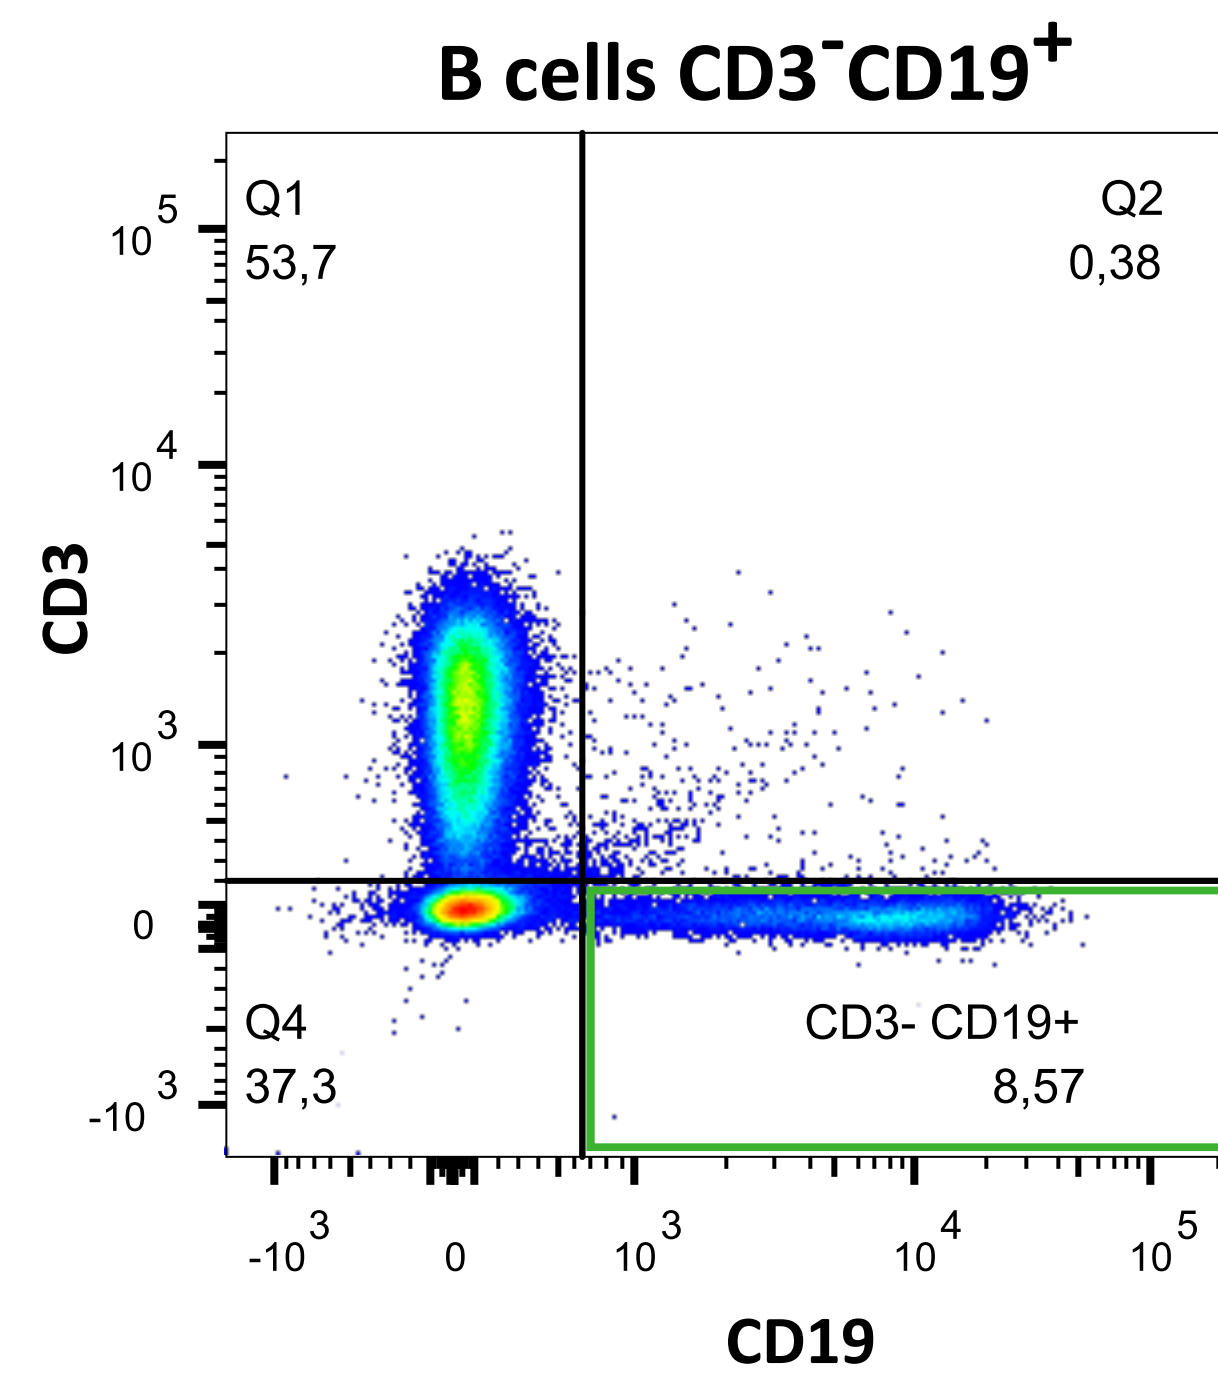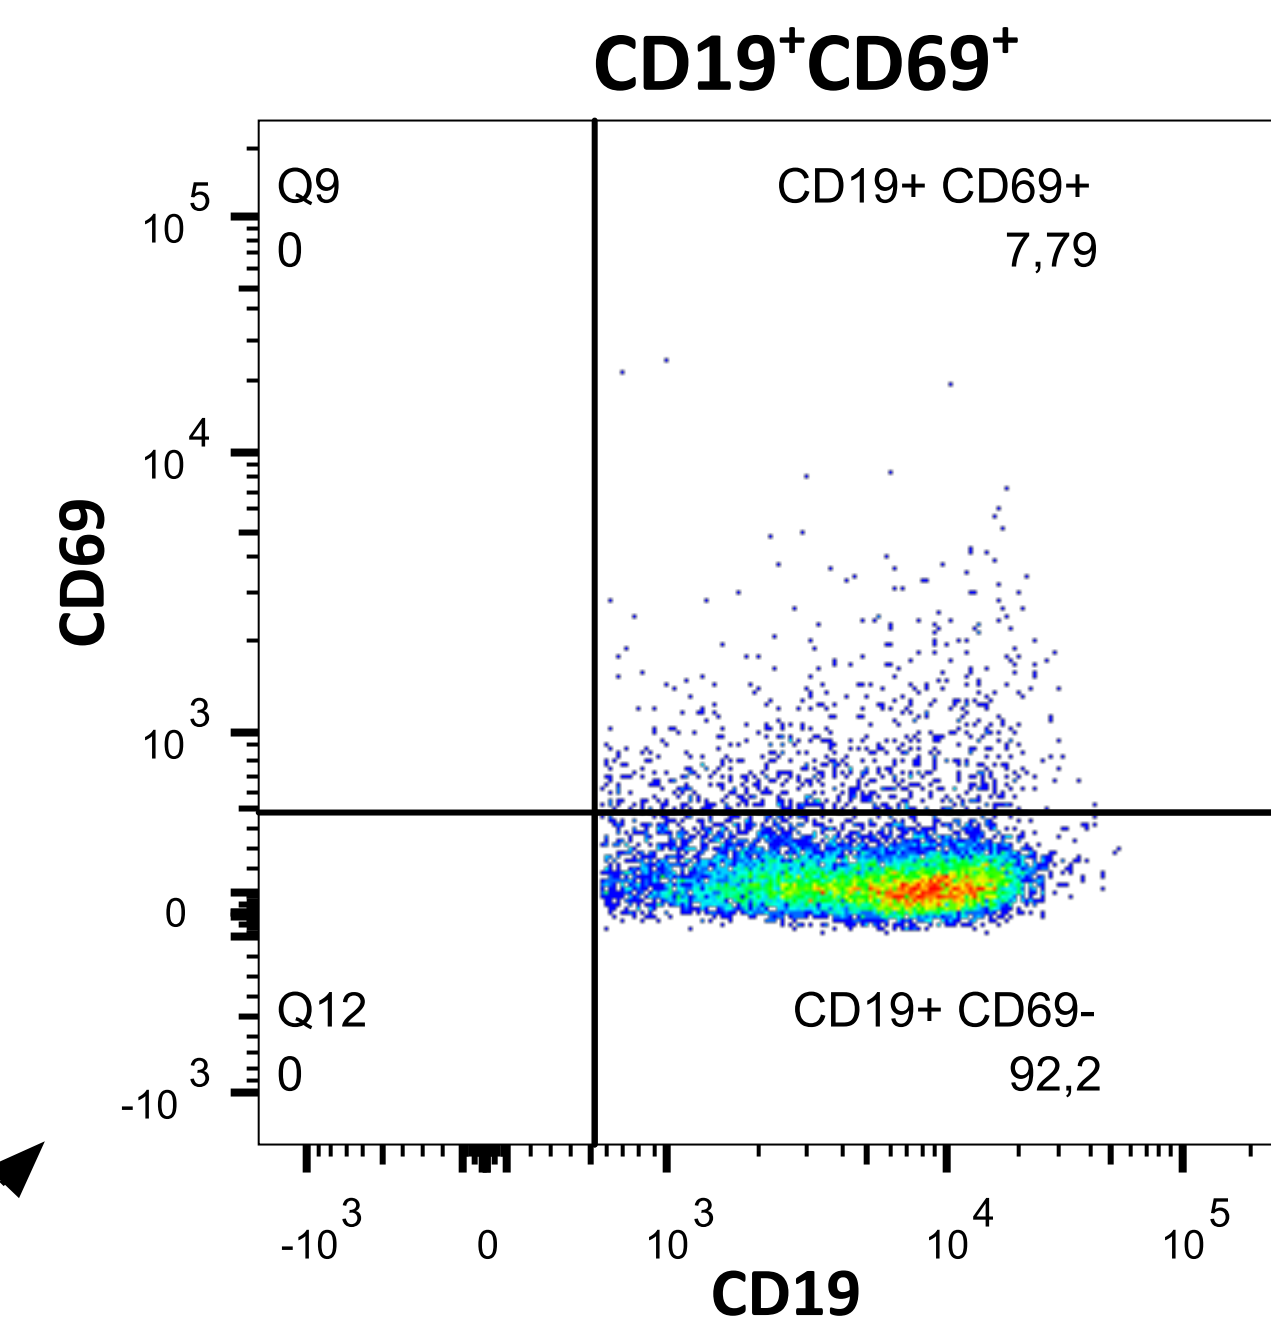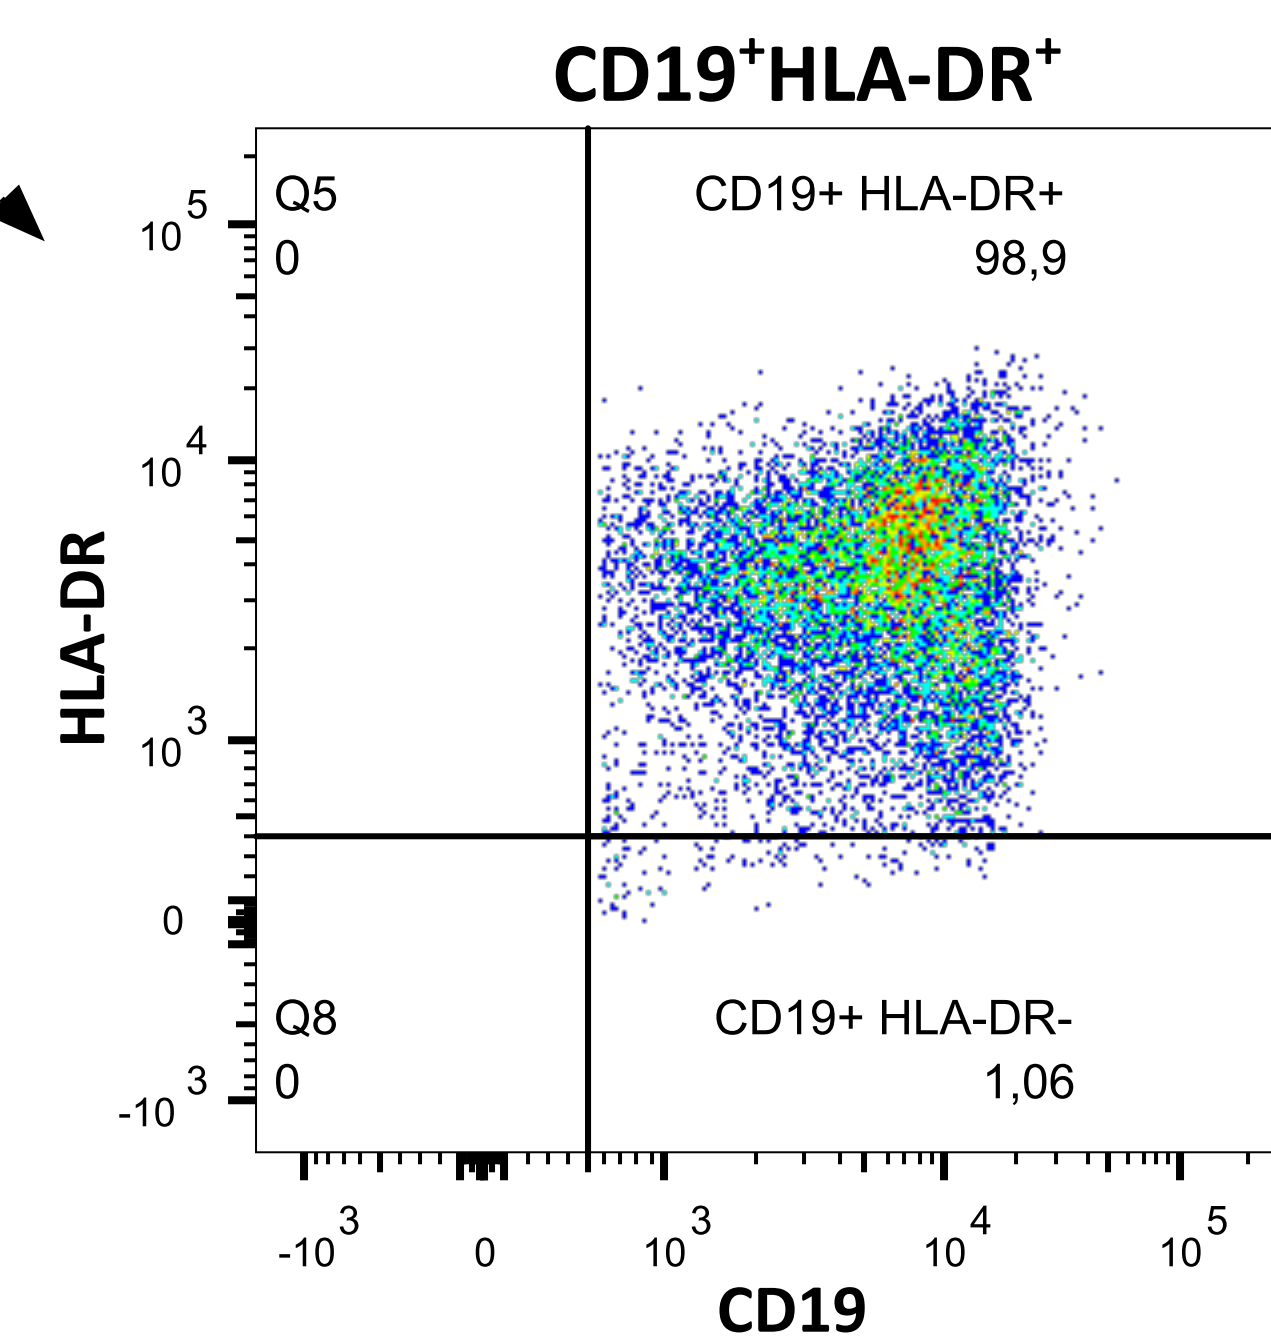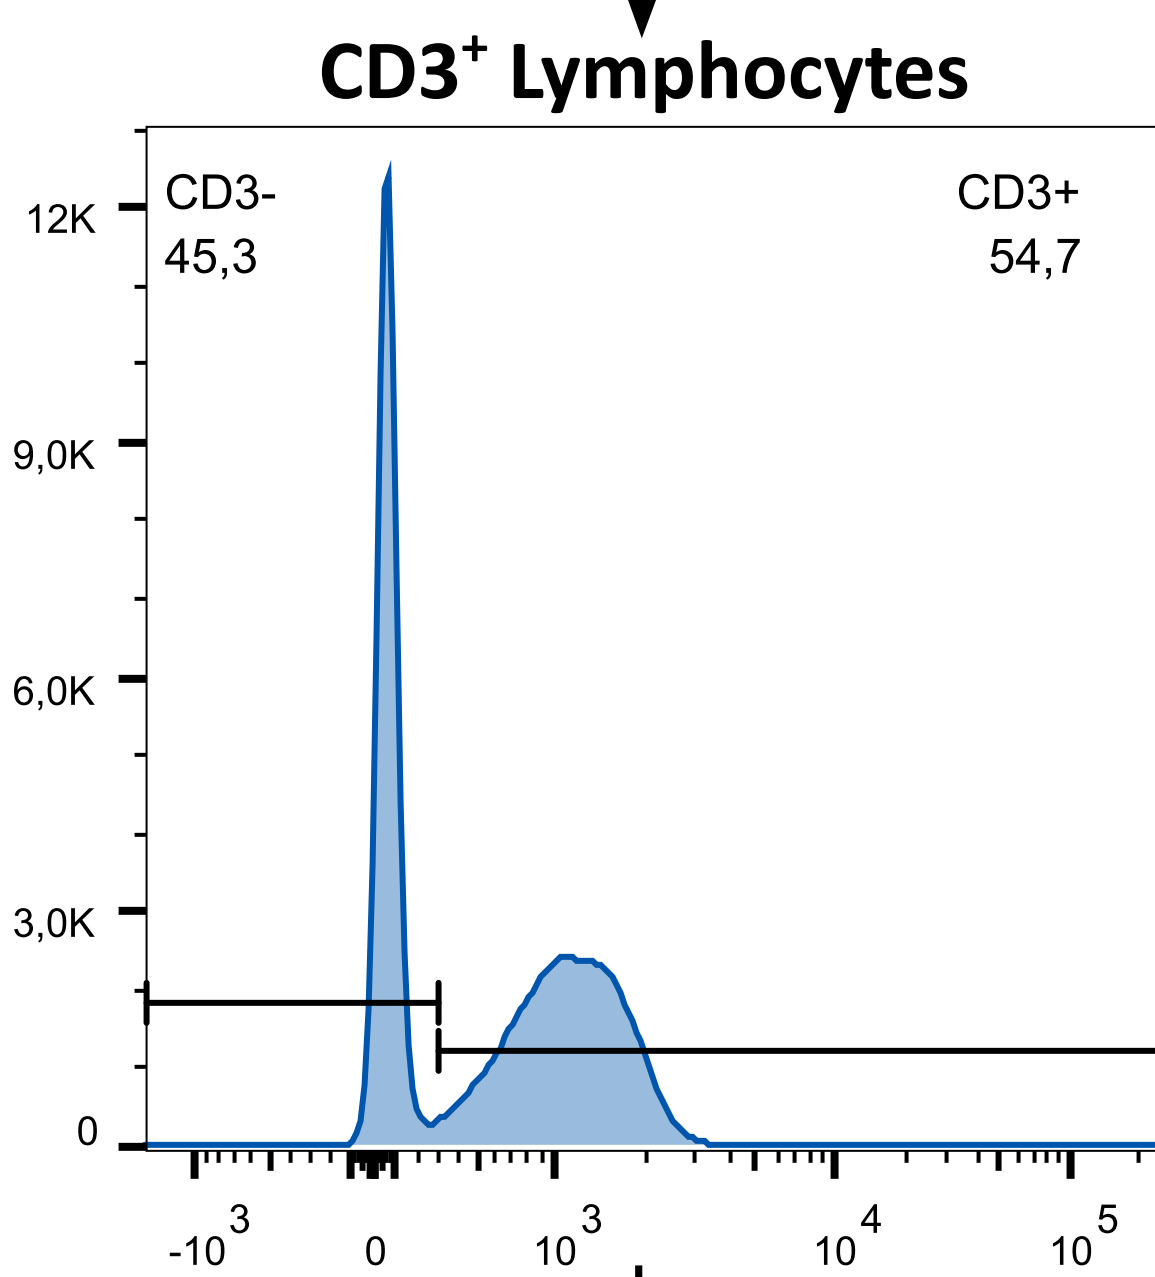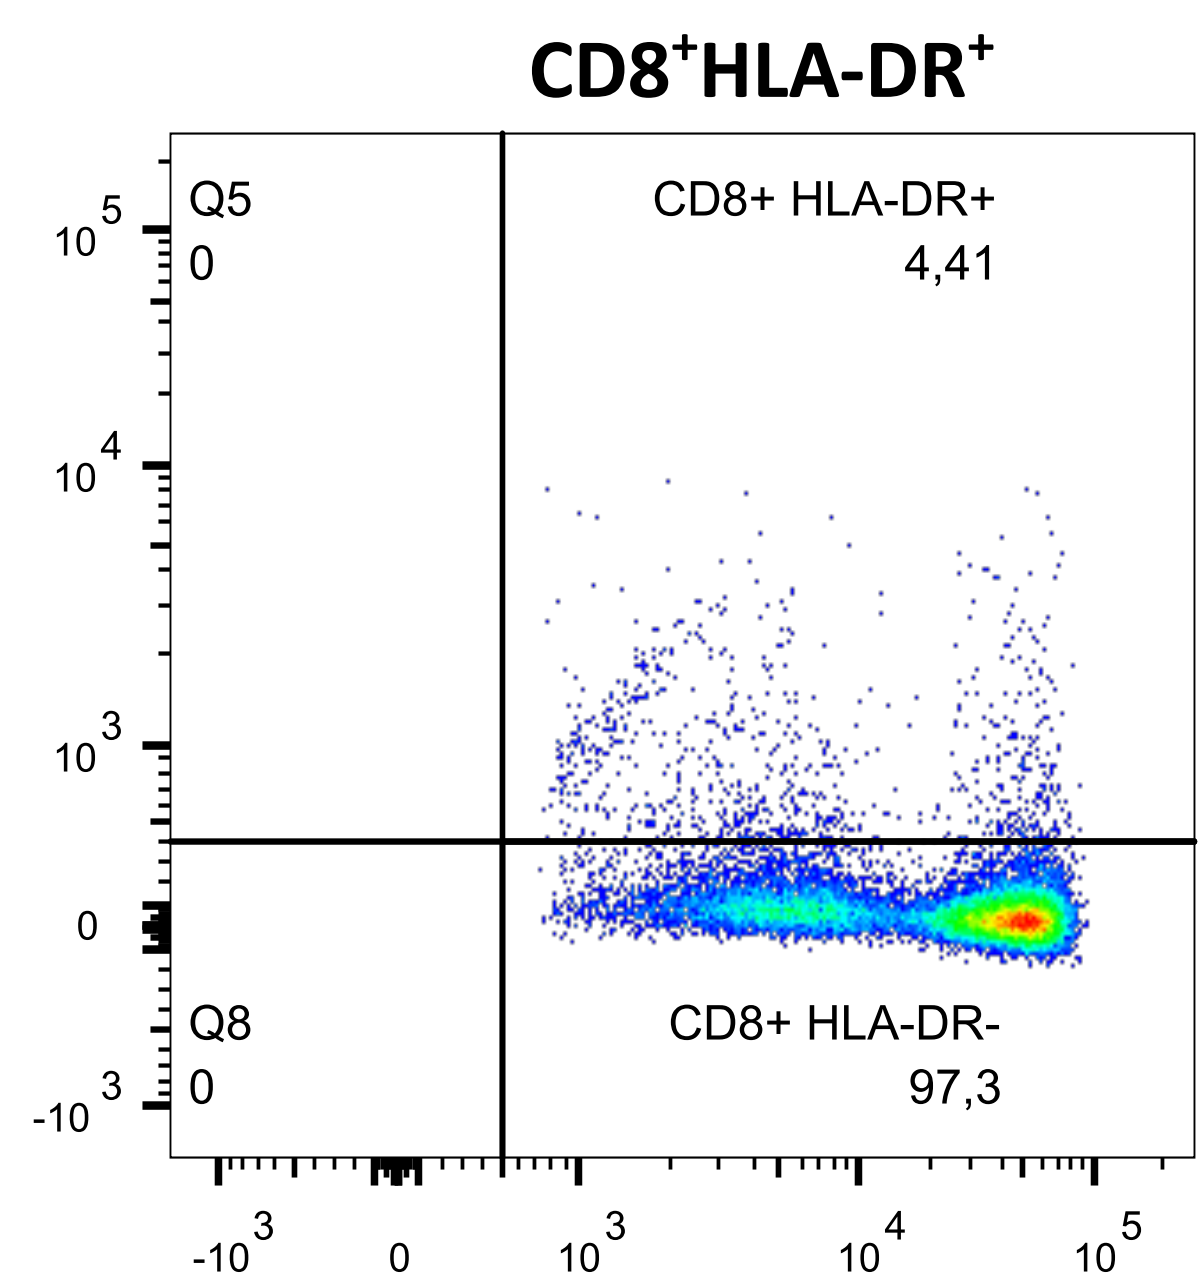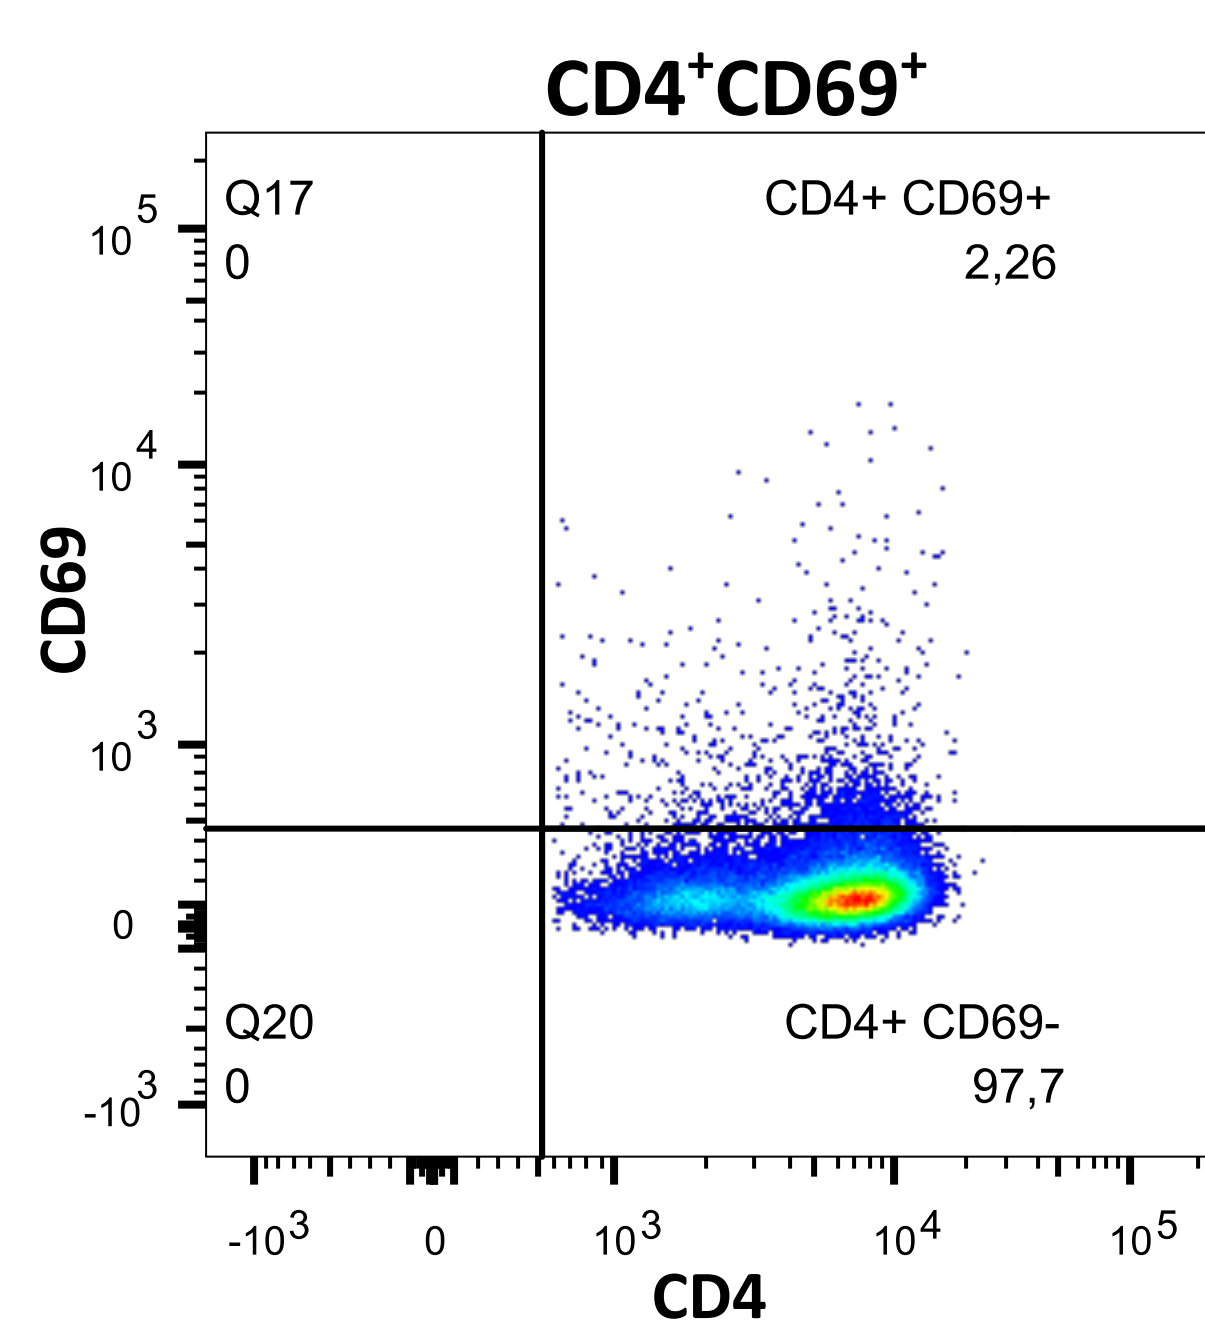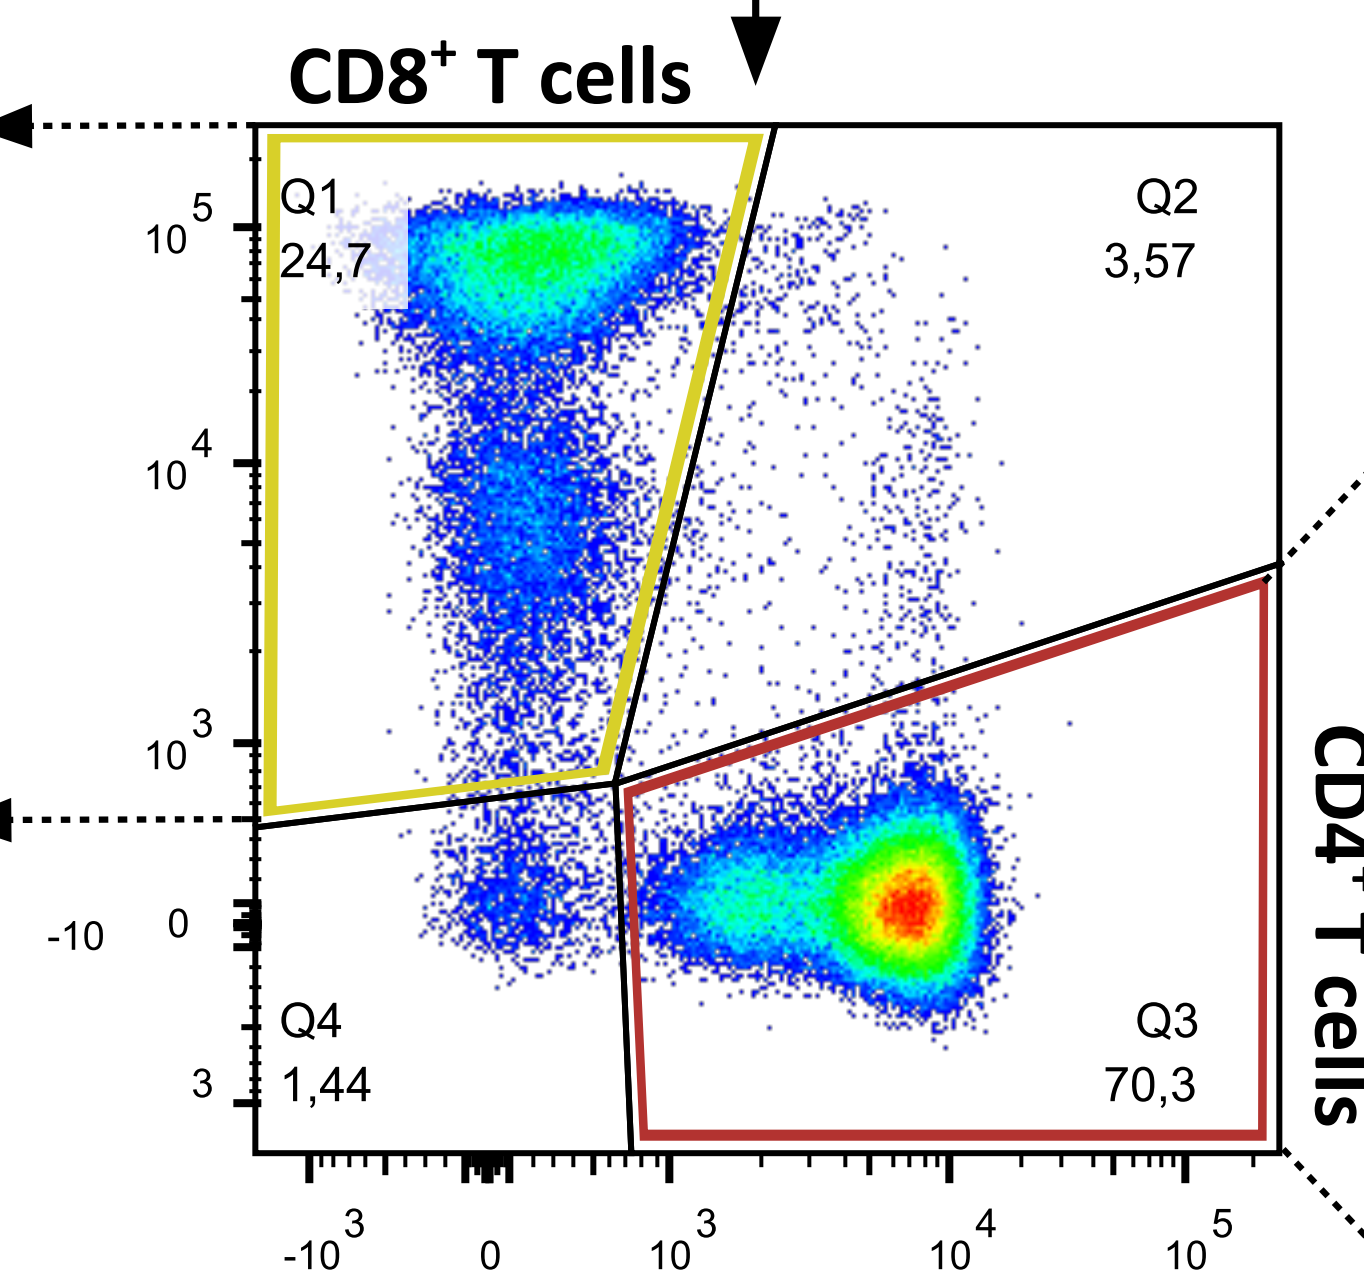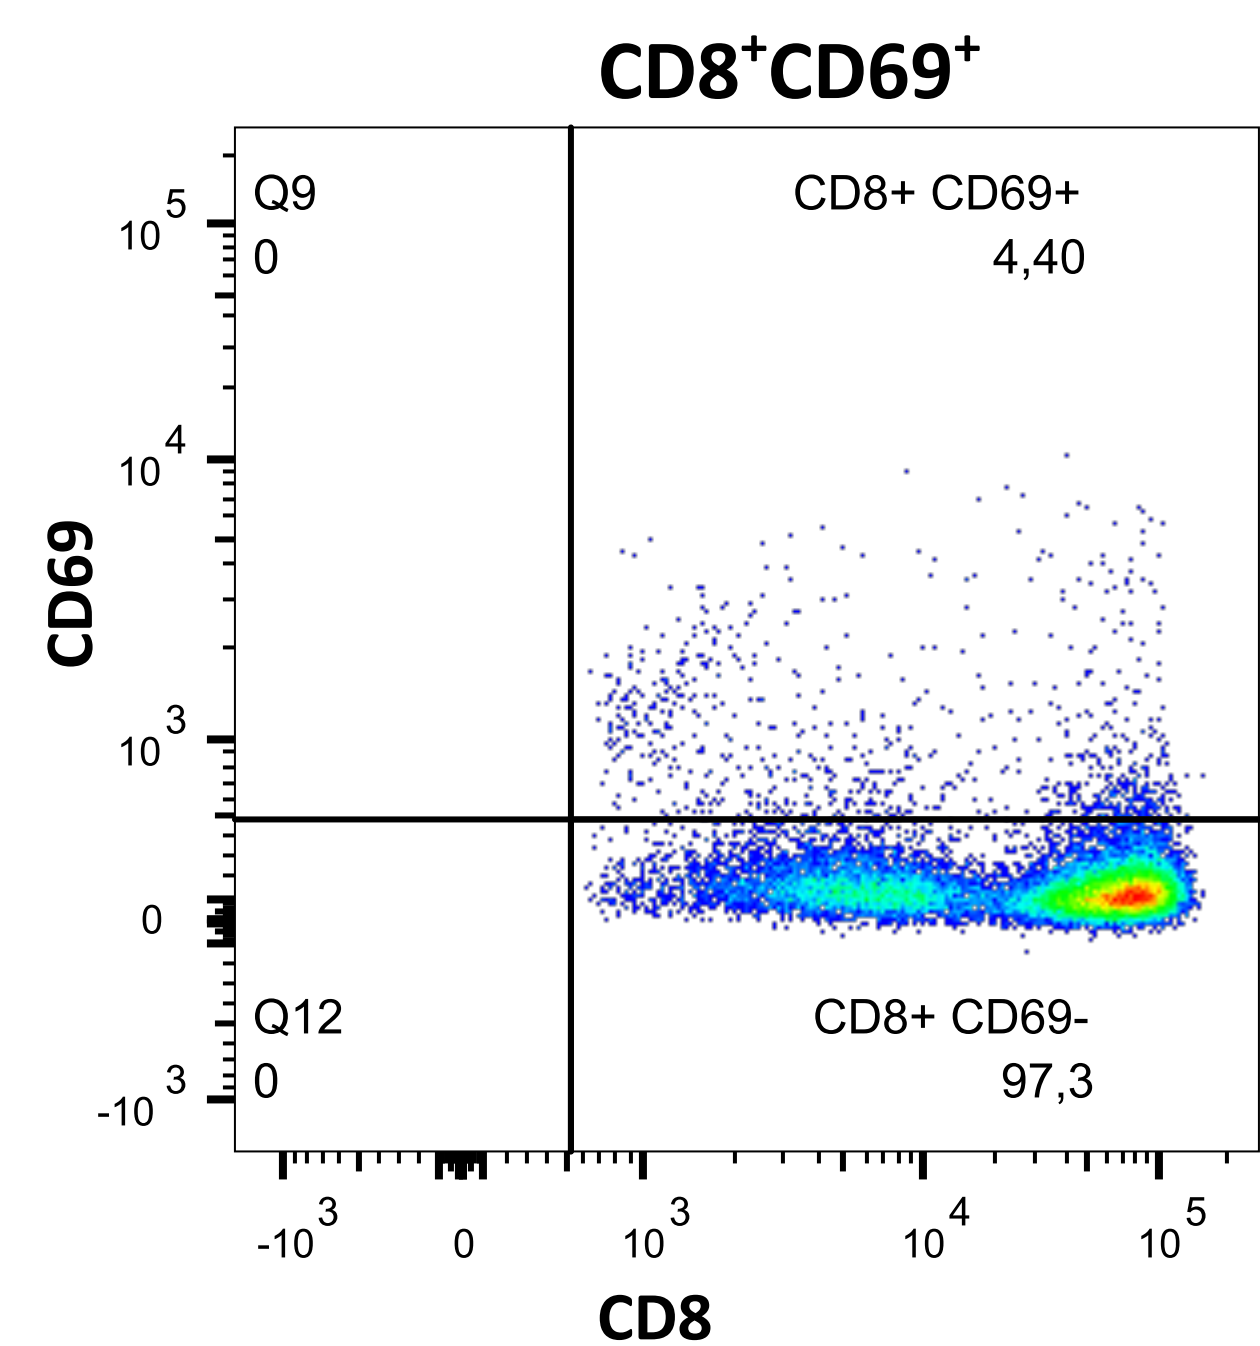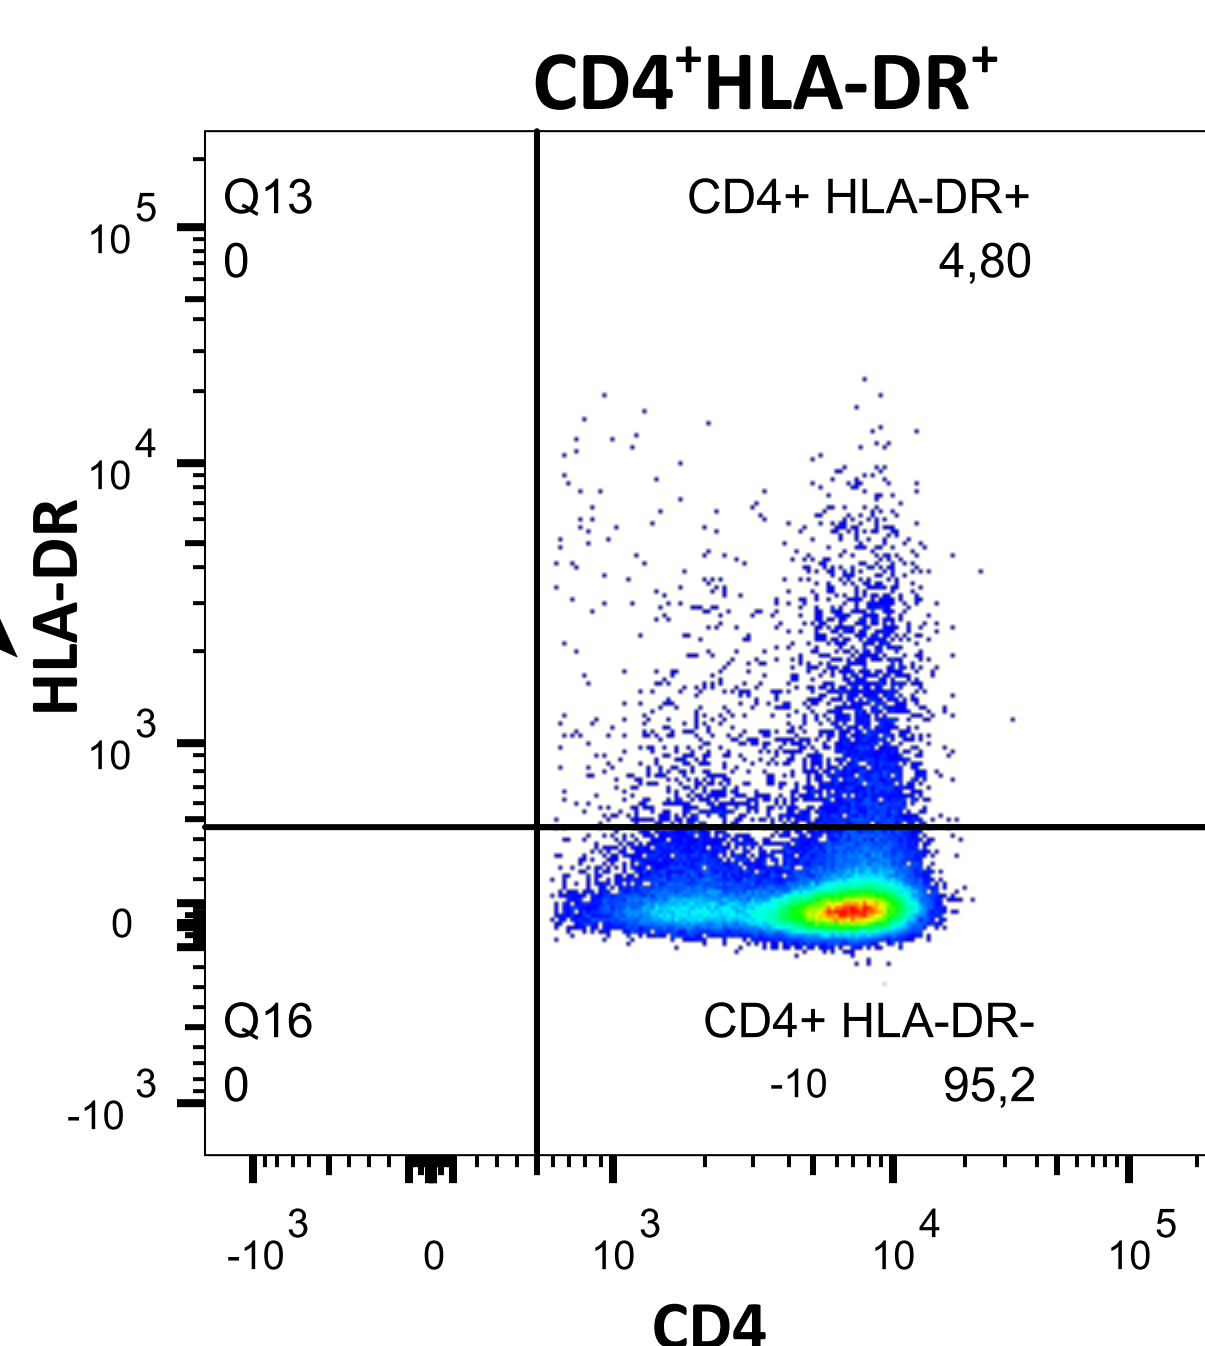

Supplement: IMM-155-367-s001.pdf [file IMM-155-367-s001.pdf]

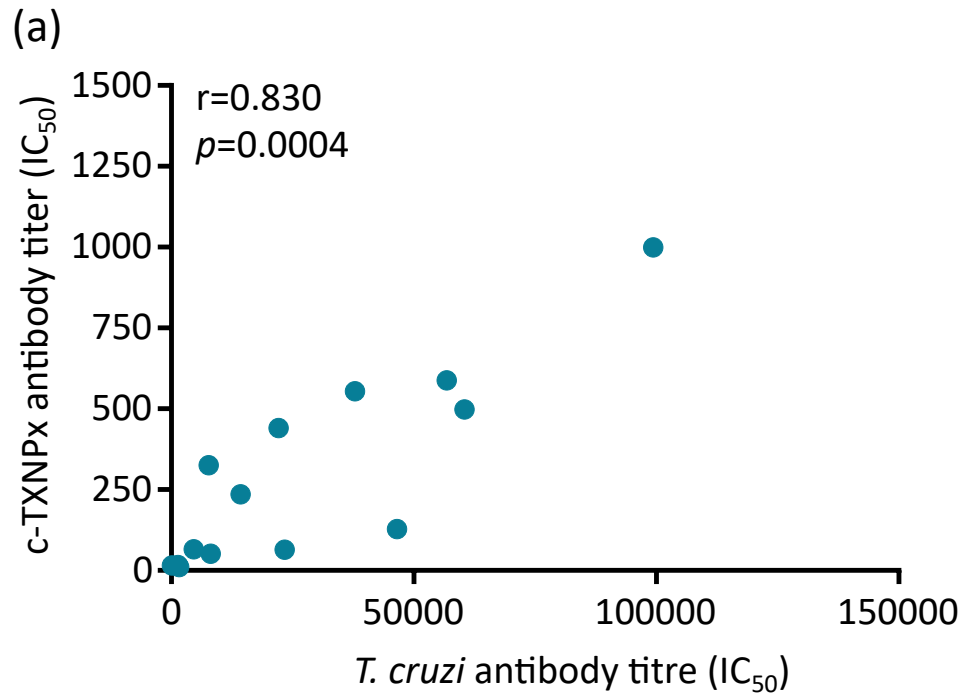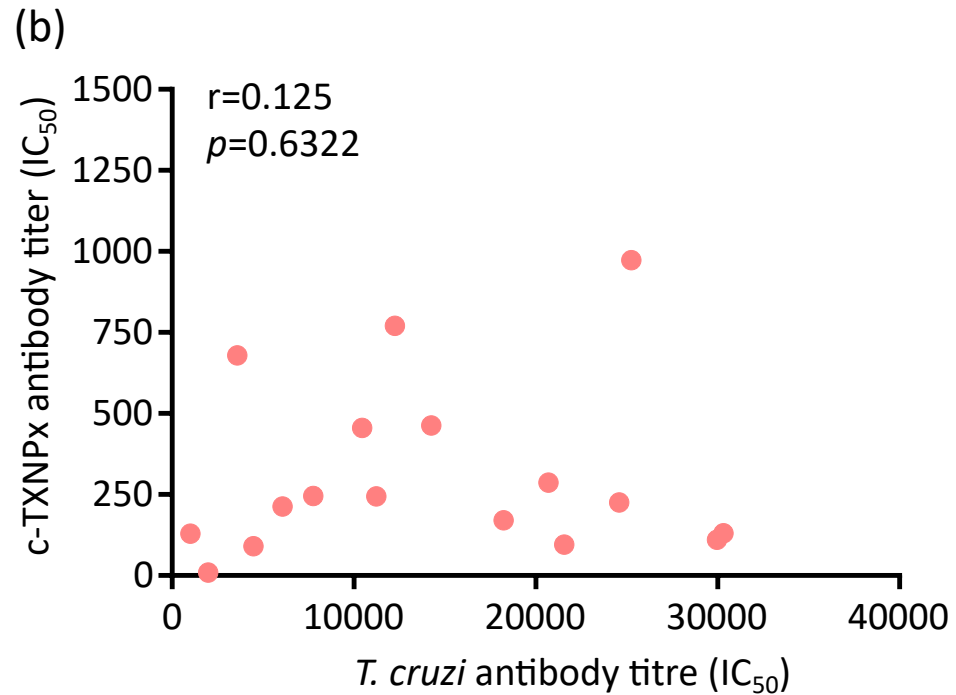

Supplement: IMM-155-367-s002.pdf [file IMM-155-367-s002.pdf]

## c-TXNPx

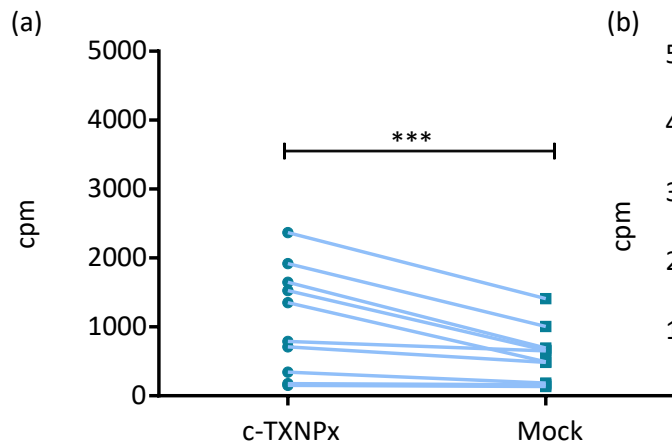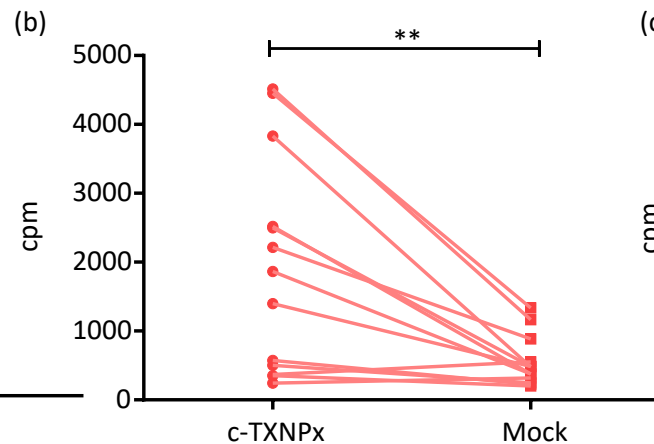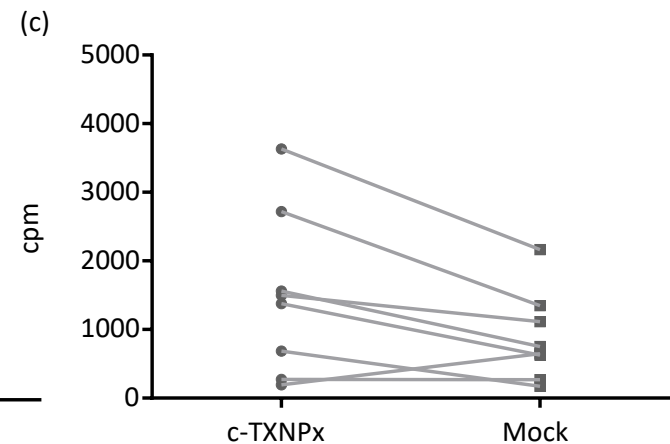

## *T. cruzi*

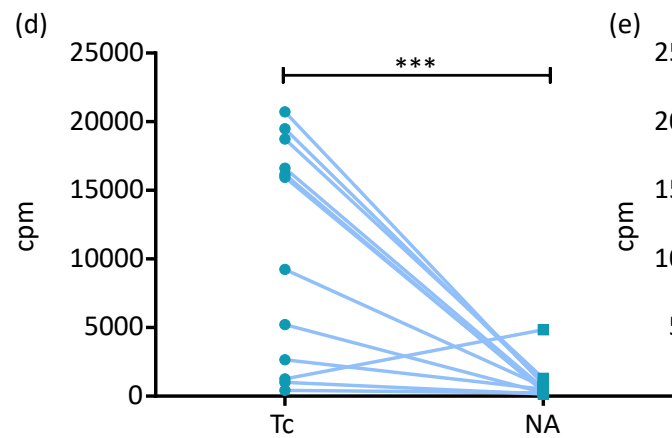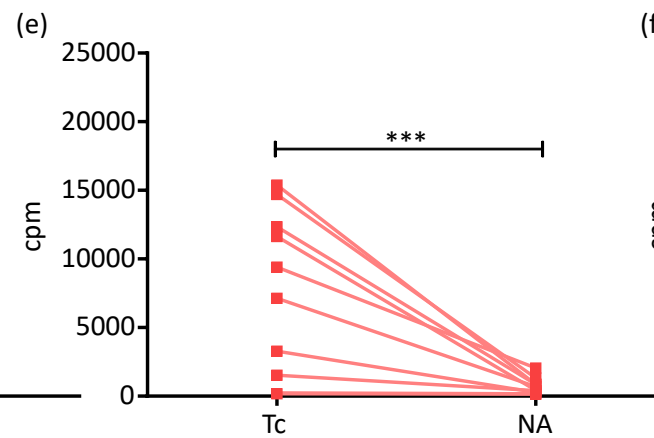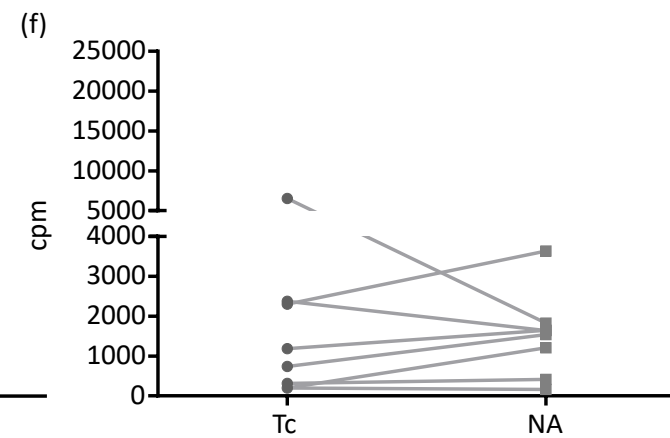

Supplement: IMM-155-367-s003.pdf [file IMM-155-367-s003.pdf]

## c-TXNPx

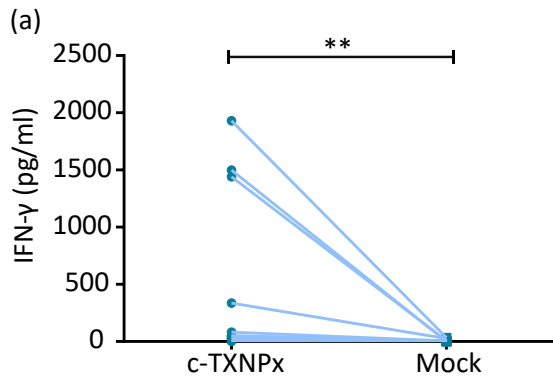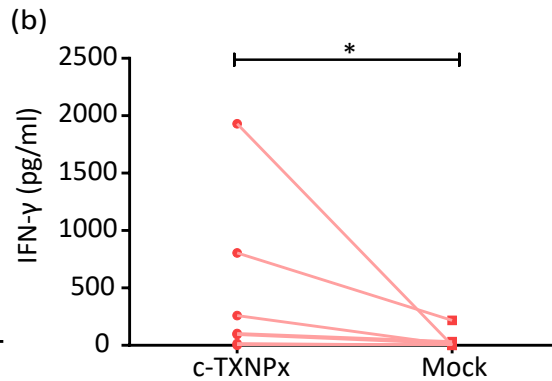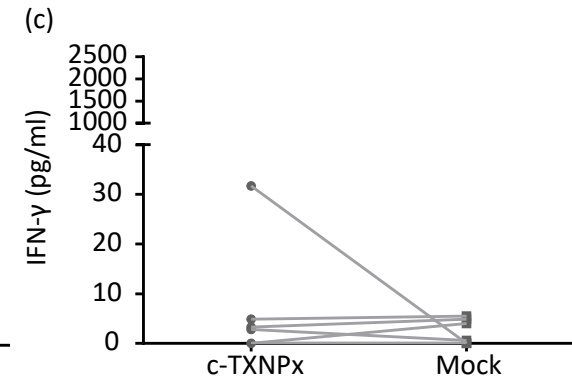

## *T. cruzi*

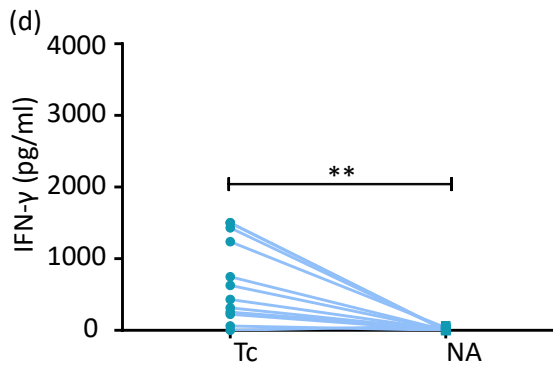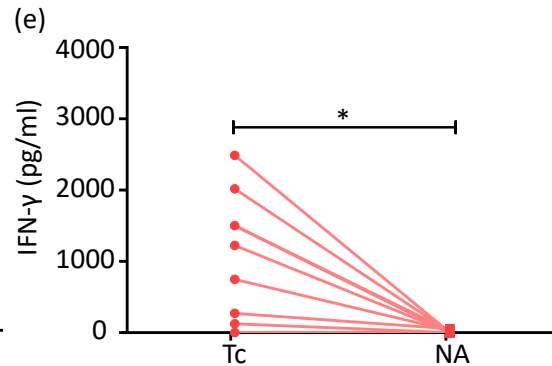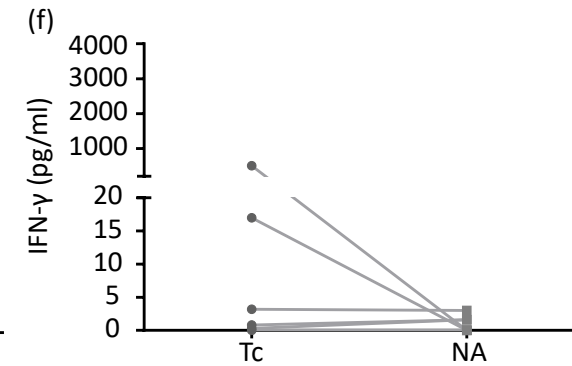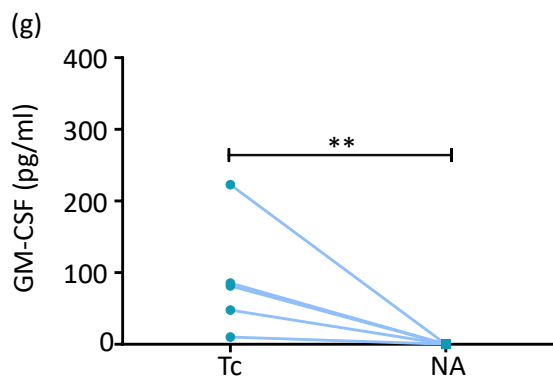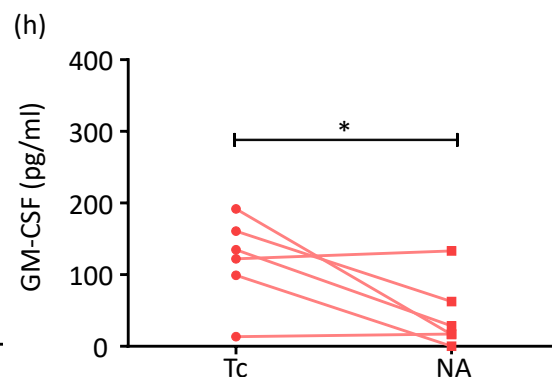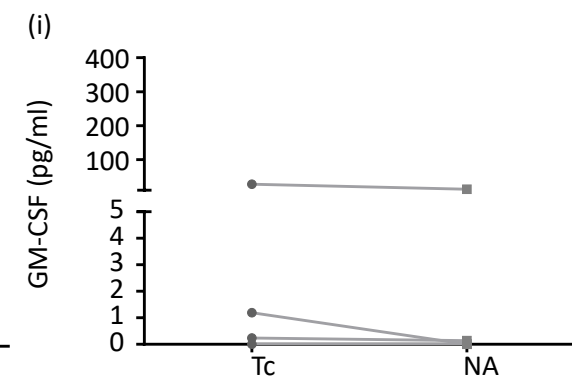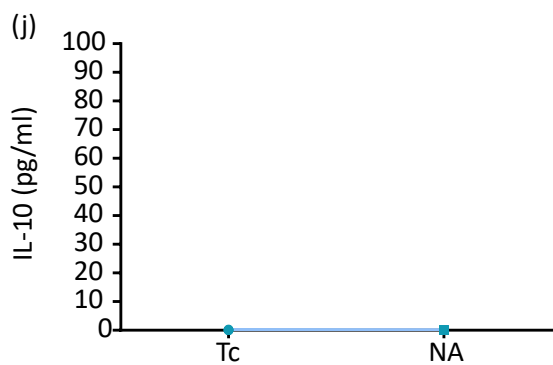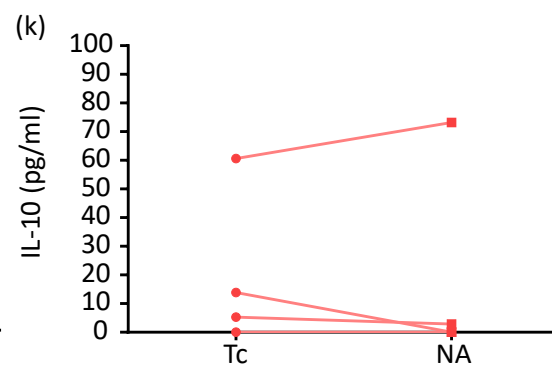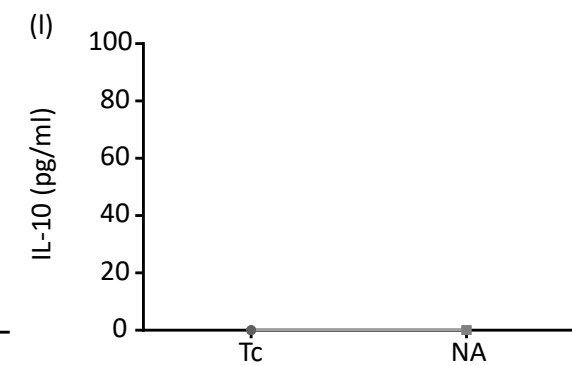

Supplement: IMM-155-367-s004.pdf [file IMM-155-367-s004.pdf]

(a)

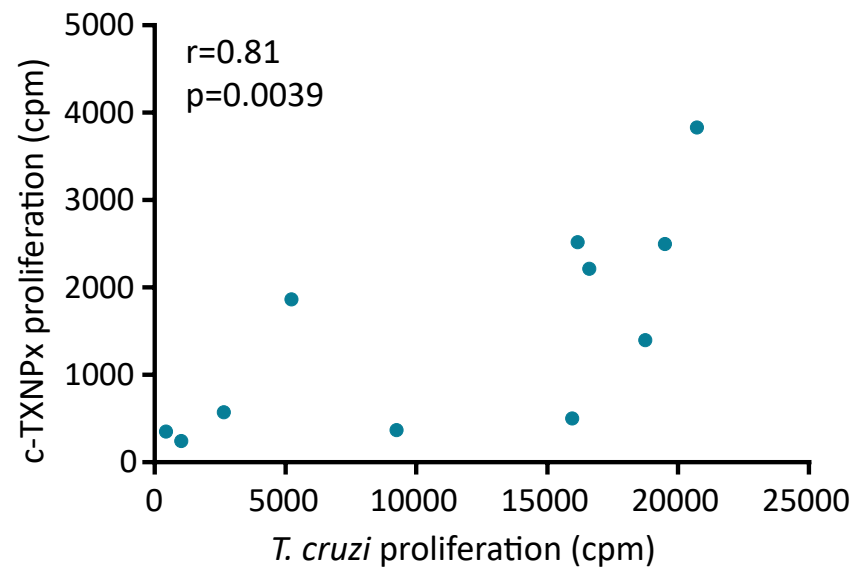

(b)

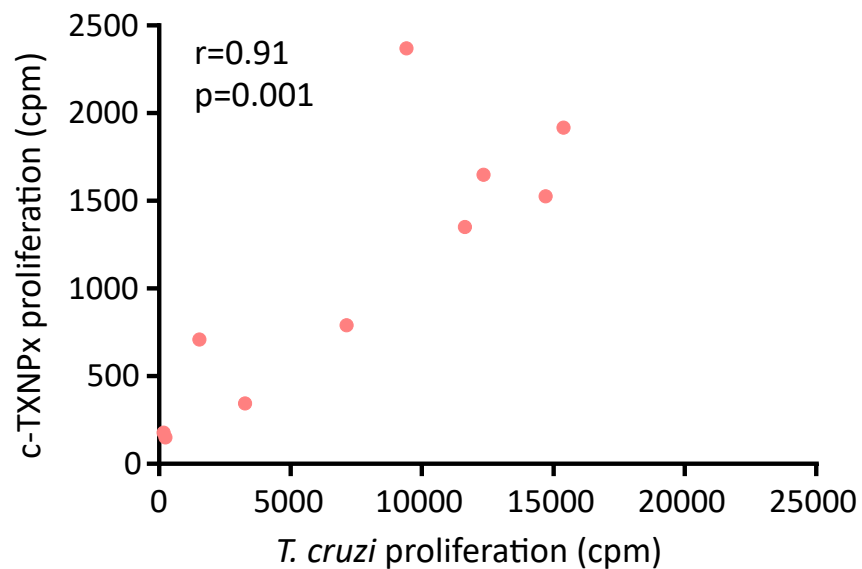

(c)

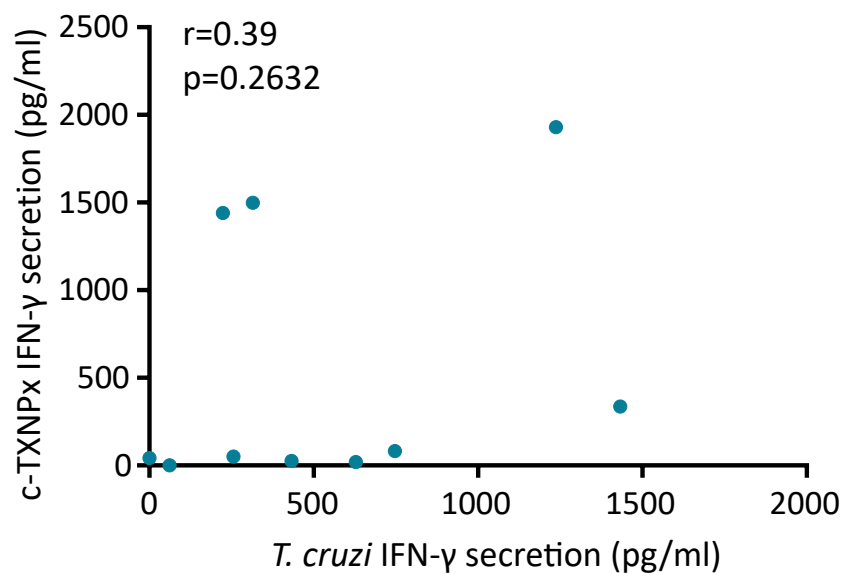

(d)

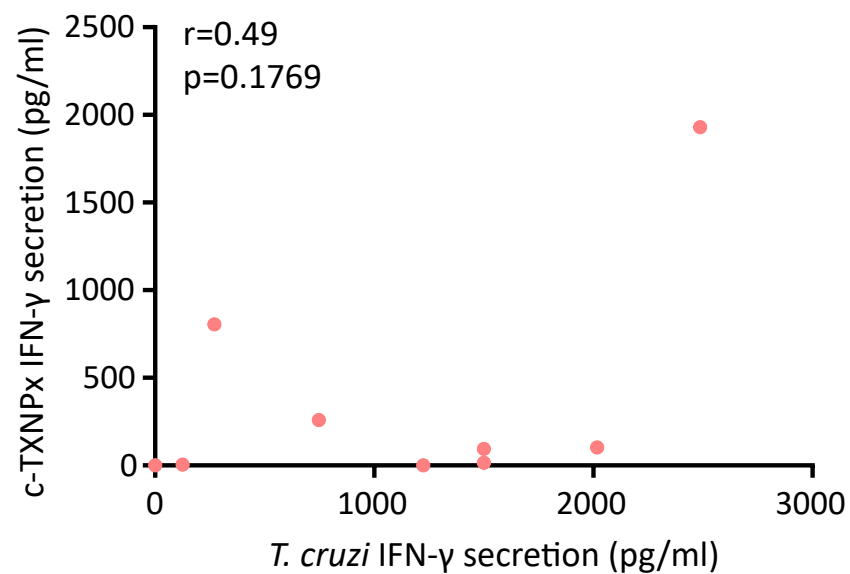

Supplement: IMM-155-367-s005.pdf [file IMM-155-367-s005.pdf]
